# Supplementary material for: [Fe(CN)6]4− decorated mesoporous gelatin thin films for colorimetric detection and as sorbents of heavy metal ions
Source: Royal Society of Chemistry journal article supplement (doi:10.1039/c3dt50823d), 2013-01-01
Supplement: c3dt50823d.pdf [file c3dt50823d.pdf]

## Supplementary Information

# $[\text{Fe}(\text{CN})_6]^{4-}$ Decorated Mesoporous Gelatin Thin Films for Colorimetric Detection and Sorbent of Heavy Metal Ions

Li Shi,<sup>a</sup> Hubiao Huang,<sup>a</sup> Luwei Sun,<sup>a</sup> Yanping Lu,<sup>b</sup> Binyang Du,<sup>b</sup> Yiyin Mao,<sup>a</sup> Junwei Li,<sup>a</sup>

Zhizhen Ye,<sup>a,c</sup> Xinsheng Peng<sup>a,c\*</sup>

<sup>a</sup>State Key Laboratory of Silicon Materials, Department of Materials Science and Engineering,

<sup>b</sup>MOE Key Laboratory of Macromolecular Synthesis and Functionalization, Department of

Polymer Science & Engineering, <sup>c</sup>Cyrus Tang Center for Sensor Materials and Applications,

Zhejiang University, Hangzhou, China

### 1. TEM images of the gelatin/PB analogues composites films

The TEM images, Figure S1a-d, demonstrate that the  $\text{M}_x[\text{Fe}(\text{CN})_6]_y$  nanoparticle (M= Cu, Co, Pb, Cd) were synthesized within preloaded  $[\text{Fe}(\text{CN})_6]^{4-}$  gelatin films. The average sizes of the  $\text{M}_x[\text{Fe}(\text{CN})_6]_y$  nanoparticle (M= Cu, Co, Pb, Cd) are 12.3, 4.0, 4.4 and 16.8 nm, respectively.

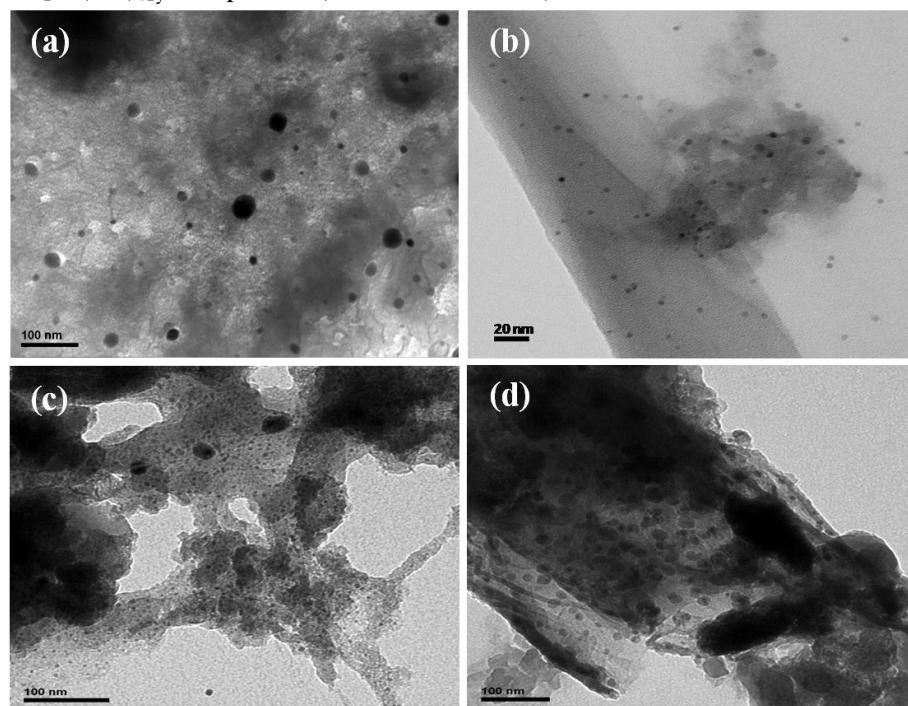

**Figure S1** TEM images of the gelatin/ $[\text{Fe}(\text{CN})_6]^{4-}$  films after immersing into 10 ml, 100 $\mu\text{M}$  solution of (a)  $\text{Cu}^{2+}$ ; (b)  $\text{Co}^{2+}$ ; (c)  $\text{Pb}^{2+}$  and (d)  $\text{Cd}^{2+}$  for 5 minutes, respectively.

2. The gelatin/[Fe(CN)<sub>6</sub>]<sup>4-</sup> films detect Cu<sup>2+</sup>, Co<sup>2+</sup>, Pb<sup>2+</sup> and Cd<sup>2+</sup> aqueous solution at the concentration of 1 ppm, respectively.

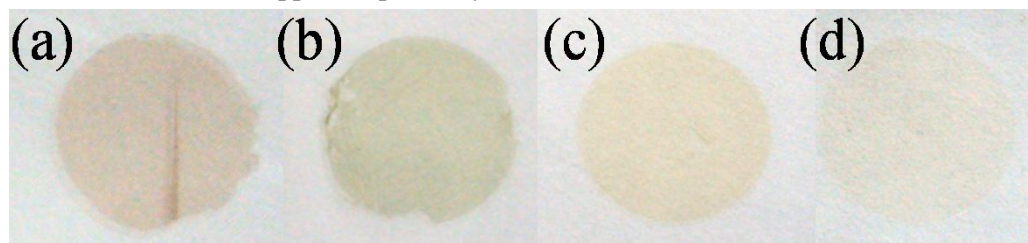

**Figure S2** The photo images of the color change for the colorimetric detection of (a) Cu<sup>2+</sup>; (b) Co<sup>2+</sup>; (c) Pb<sup>2+</sup> and (d) Cd<sup>2+</sup>, respectively. The metal ions concentration is 1 ppm and the response time is 5 minutes.

### 3. Energy dispersive X-ray spectrum analysis

The Fe element comes from [Fe(CN)<sub>6</sub>]<sup>4-</sup> in the gelatin films and S element comes from gelatin itself. The Cu, Co, Pb and Cd elements appear because of the adsorption by gelatin/[Fe(CN)<sub>6</sub>]<sup>4-</sup> films from metal ions solution.

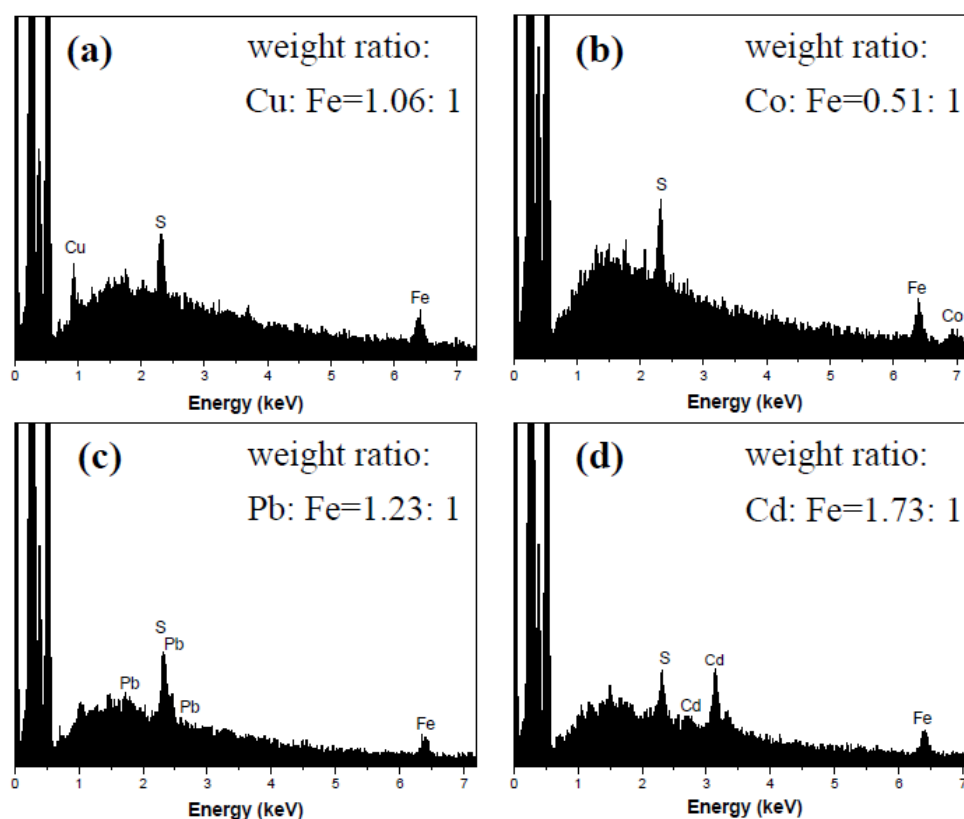

**Figure S3** The EDX spectrum of [Fe(CN)<sub>6</sub>]<sup>4-</sup> decorated gelatin film after immersing into 10 ml, 25  $\mu$ M solution of (a) Cu<sup>2+</sup>; (b) Co<sup>2+</sup>; (c) Pb<sup>2+</sup> and (d) Cd<sup>2+</sup> for 7 days, respectively.
